# Supplementary material for: Synthesis of γ-lactols, γ-lactones and 1,4-monoprotected succinaldehydes under moderately concentrated sunlight
Source: Royal Society of Chemistry journal article supplement (doi:10.1039/b904427b), 2009-01-01

Supporting Information for:

## Synthesis of $\gamma$ -Lactols, $\gamma$ -Lactones and 1,4-Monoprotected Succinaldehydes Under Moderately Concentrated Sunlight

Daniele Dondi<sup>a\*</sup>, Stefano Protti<sup>b</sup>, Angelo Albini<sup>b</sup>, Sonia Mañas Carpio<sup>c,d</sup> and Maurizio Fagnoni<sup>b</sup>

<sup>a</sup>Department of General Chemistry, University of Pavia, V.le Taramelli 10, 27100 Pavia (Italy)

<sup>b</sup>Department of Organic Chemistry, University of Pavia, V.le Taramelli 12, 27100 Pavia (Italy)

<sup>c</sup>Área de Química Inorgánica, Facultad de Ciencias, Universidad de Almería, Almería, 04120, (Spain)

<sup>d</sup> Organometallic and Photochemistry laboratory for sustainable Chemistry, Ciesol, Almería, 04120, (Spain)

\*E-mail: dondi@unipv.it; Fax: +39382528544; Tel: +39382987344

**Figure S1:** UV spectra of BPSS  $10^{-4}$  M (solid line) and  $10^{-2}$  M (dotted line) in water.

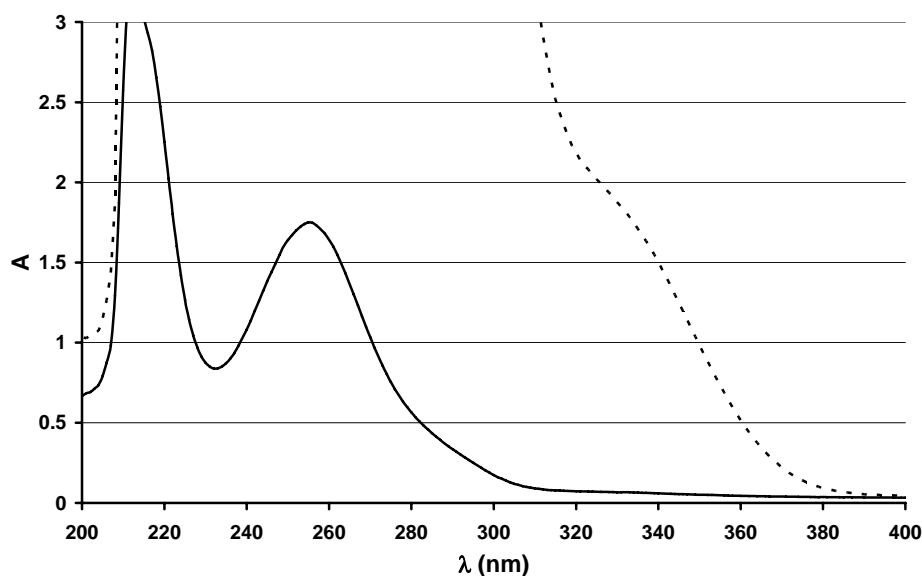

**Figure S2:** Solar radiation during the three days when the sun-driven photocatalyzed reaction between isopropanol and maleic acid was carried out (mid October to mid November period, Table 1, entry 1).

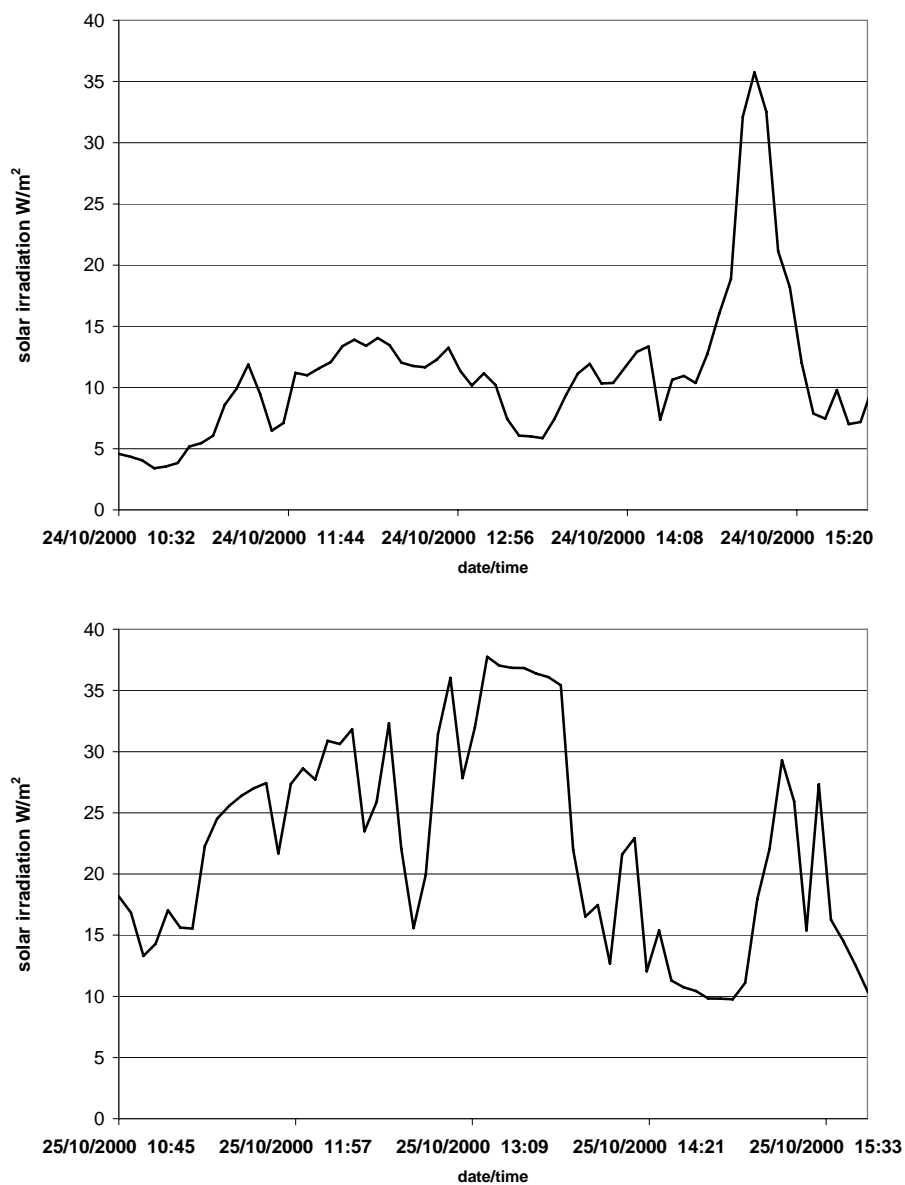

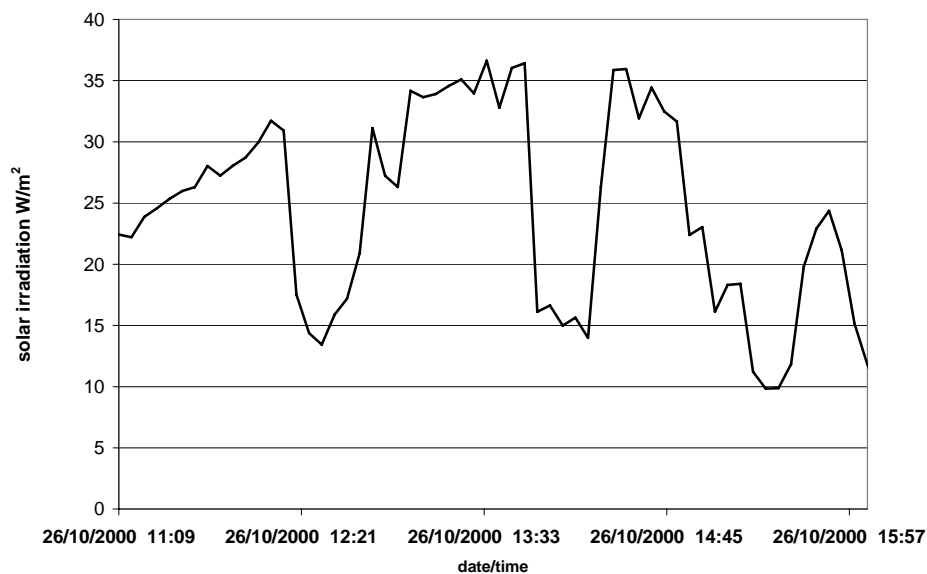

**Figure S3:** Solar irradiation during an average day in Almeria (from end June to mid July) when the reactions reported in entries 3-7 were carried out.

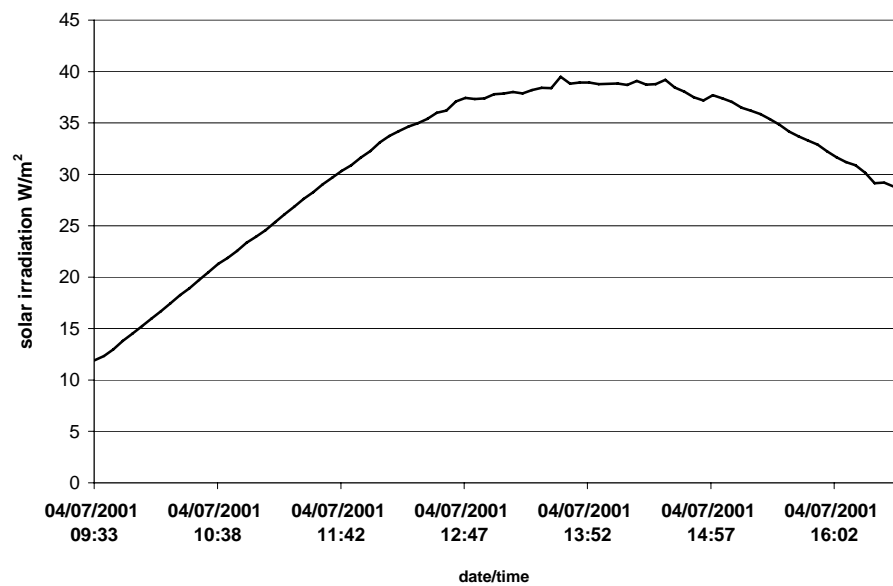

Supplement: b904427b.pdf [file b904427b.pdf]
